# Supplementary figures and images for: Does Patient Gender Influence Medical Care Among Students? Evaluation During an Objective Structured Clinical Examination
Source: Research Square preprint supplement (doi:10.21203/rs.3.rs-61600/v1), 2020-10-14

Additional file 1:


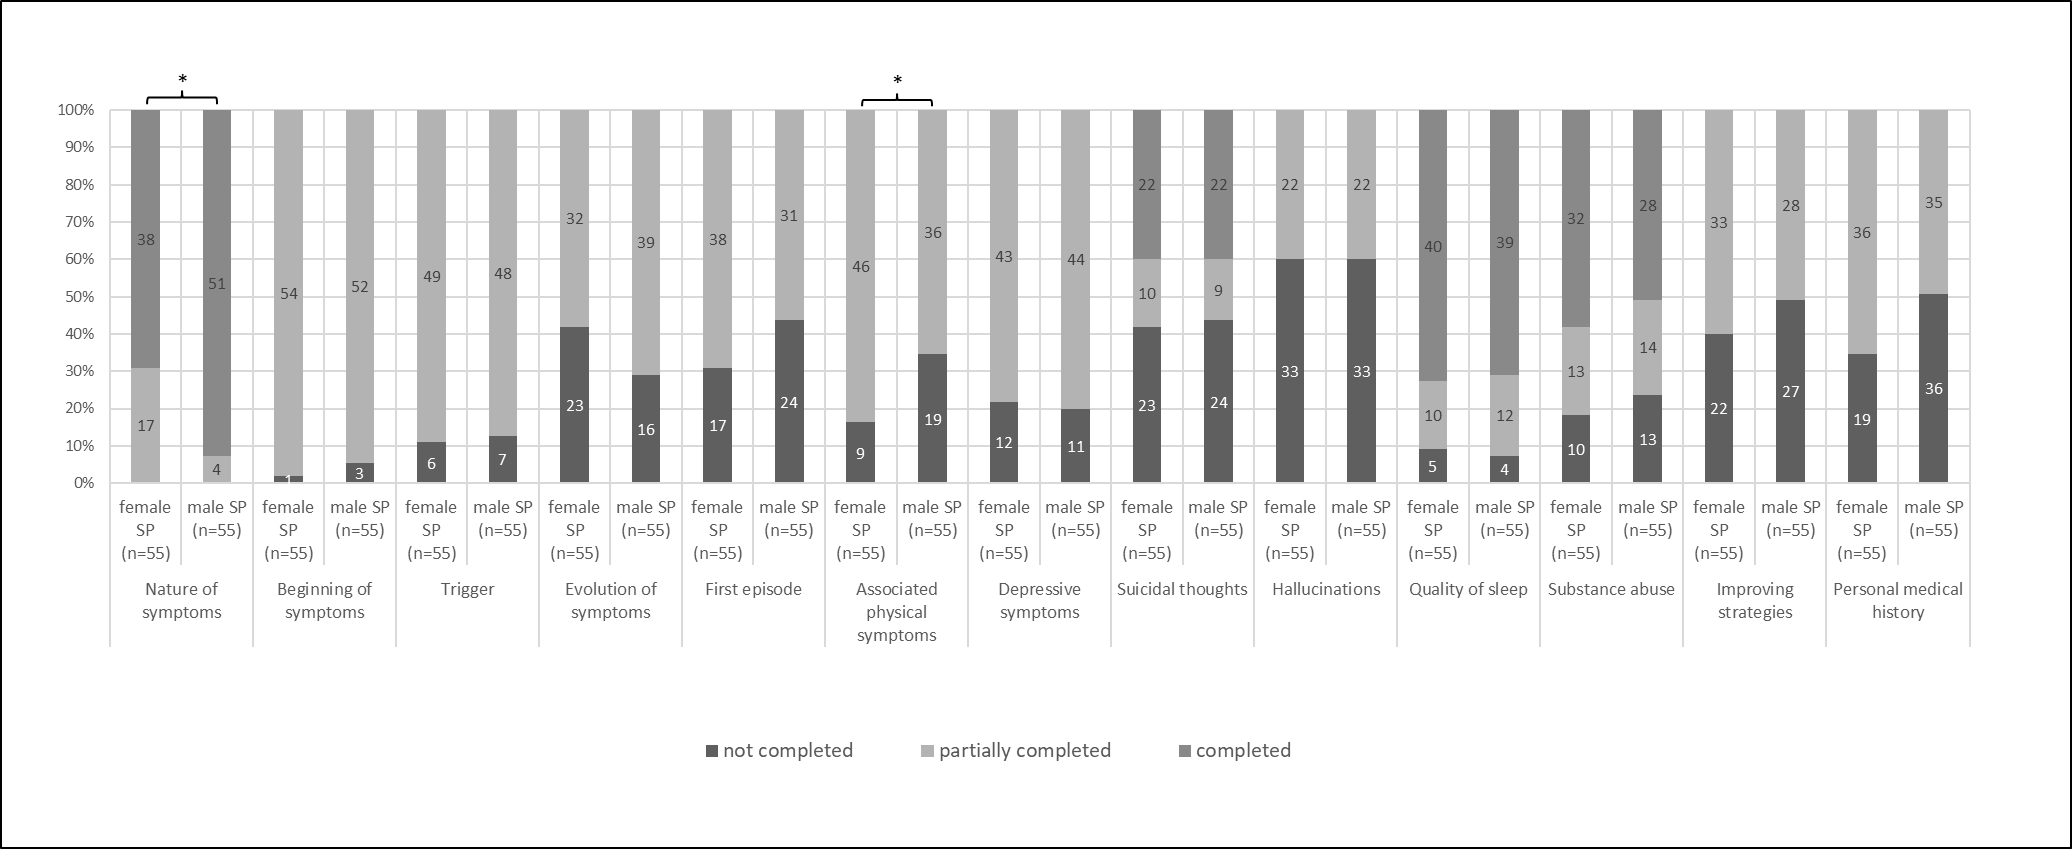


Additional file 2:
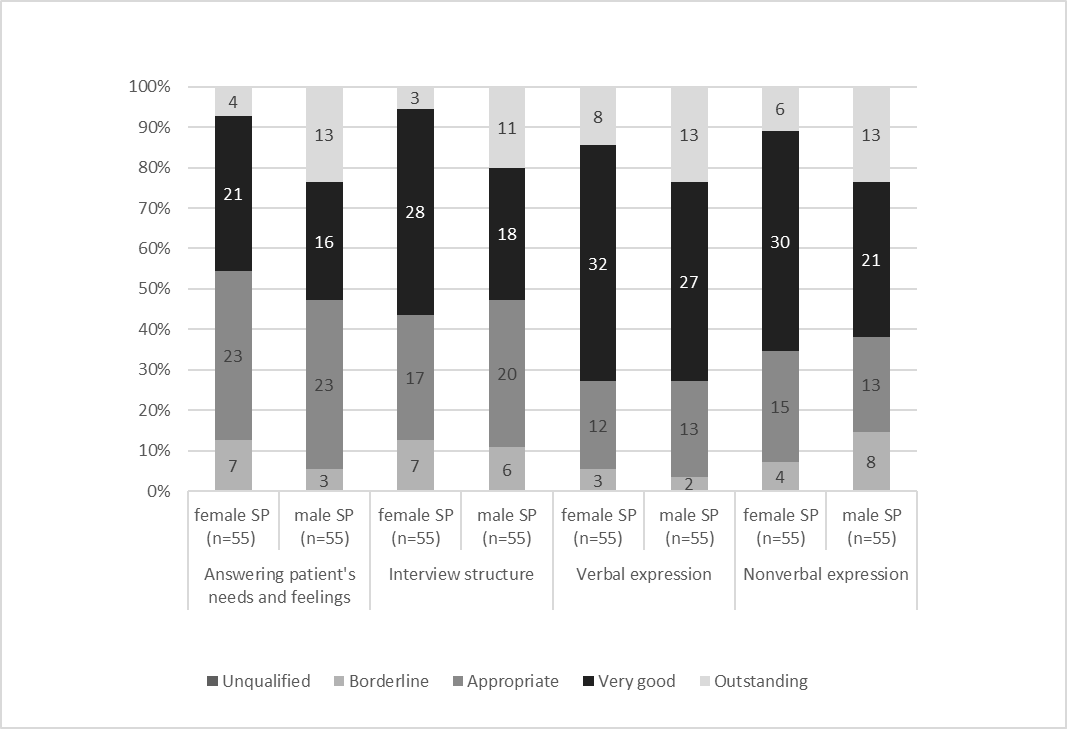


Additional file 3:


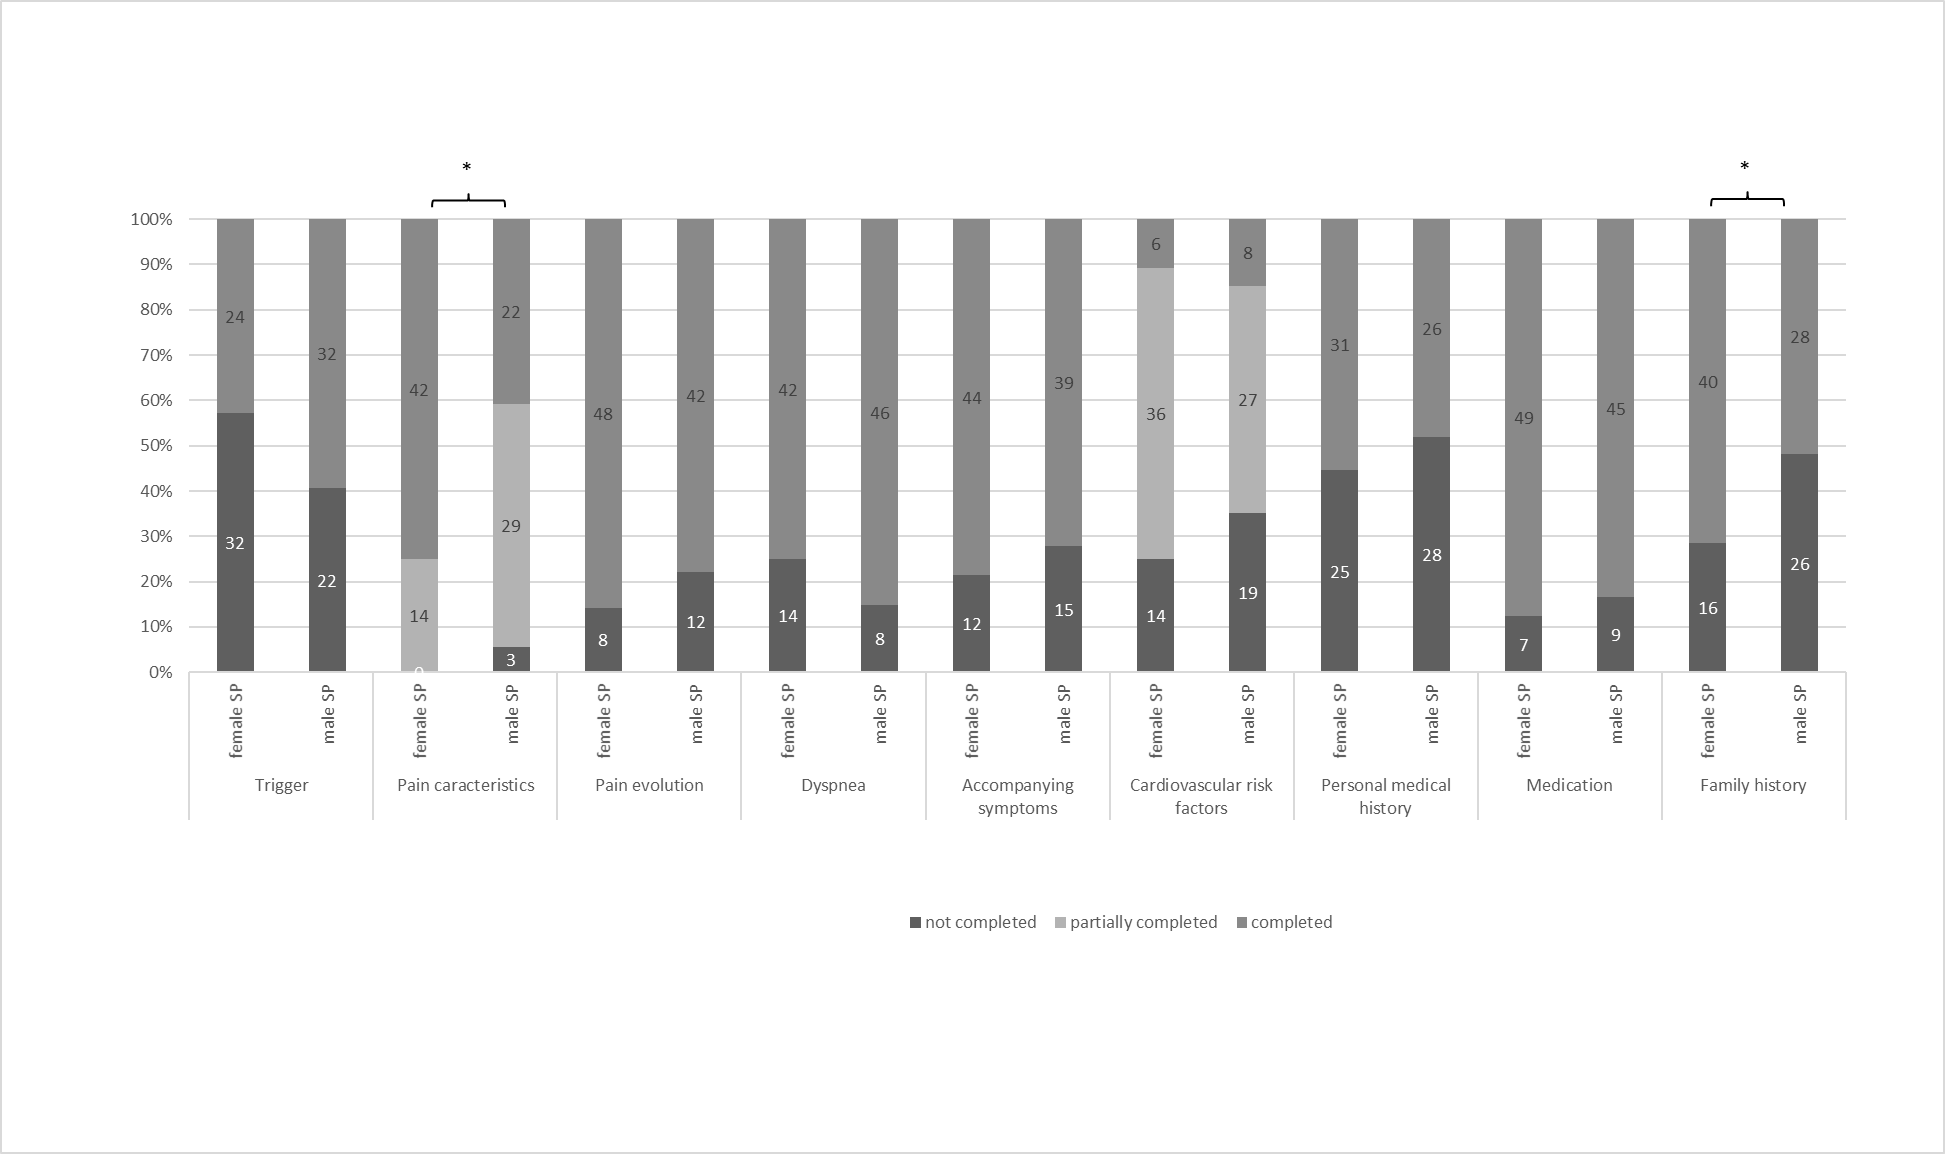


Additional file 4:


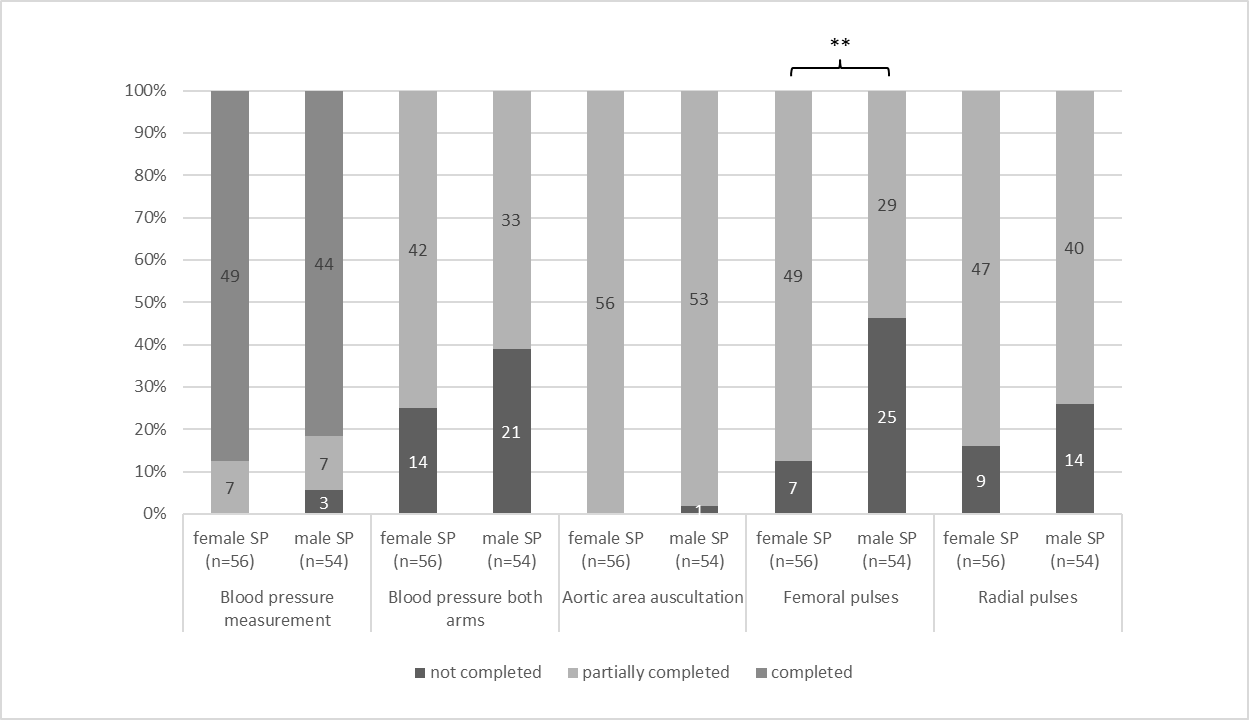


Additional file 5:
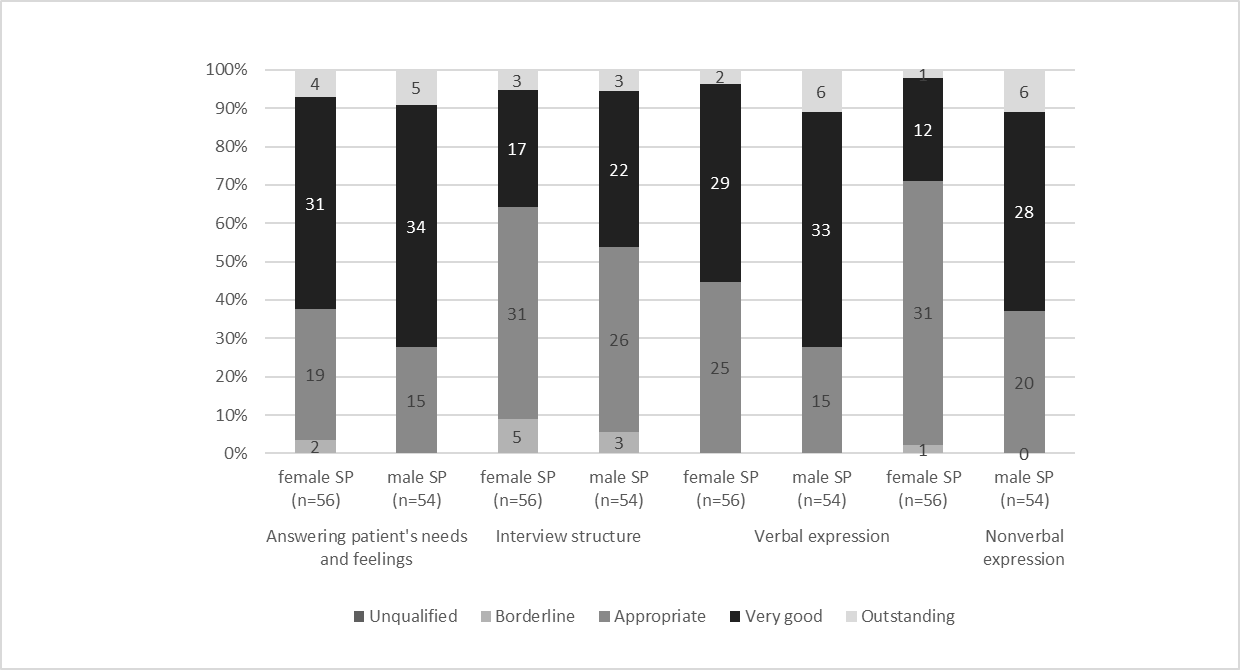

Supplement: Supplementary file 1 [file 3a0d48e67c5e8a8254ba80f6.docx]
